# Supplementary material for: Optimizing Nitrogen Balance Is Associated with Better Outcomes in Neurocritically Ill Patients
Source: PubMed Central journal article supplement (PMC7602201; doi:10.3390/nu12103137), 2020-10-14
Supplement: nutrients-12-03137-s001.pdf [file nutrients-12-03137-s001.pdf]

**Supplementary Table S1. Relationship between nitrogen balance and outcomes according to initial diagnosis**

|                                                    | <b>Positive nitrogen balance, n (%)</b> | <b>Negative nitrogen balance, n (%)</b> | <b>P-value</b> |
|----------------------------------------------------|-----------------------------------------|-----------------------------------------|----------------|
| <b>IS (n = 26, 14.9%)</b>                          | 1 (3.8)                                 | 25 (96.2)                               |                |
| <b>Good outcome at 3 months (mRS = 0-3), n (%)</b> | 1 (100)                                 | 10 (40.0)                               | 0.423          |
| <b>Neurological worsening, n (%)</b>               | 0 (0.0)                                 | 9 (36.0)                                | 1.00           |
| <b>In hospital mortality, n (%)</b>                | 0 (0.0)                                 | 8 (32.0)                                | 1.000          |
| <b>SAH (n = 30, 17.1%)</b>                         | 9 (30.0)                                | 21 (70.0)                               |                |
| <b>Good outcome at 3 months (mRS = 0-3), n (%)</b> | 6 (66.7)                                | 11 (52.4)                               | 0.691          |
| <b>Neurological worsening, n (%)</b>               | 1 (11.1)                                | 3 (14.3)                                | 1.000          |
| <b>In hospital mortality, n (%)</b>                | 1 (11.1)                                | 3 (14.3)                                | 1.000          |
| <b>ICH (n = 33, 18.9%)</b>                         | 2 (8.3)                                 | 22 (91.7)                               |                |
| <b>Good outcome at 3 months (mRS = 0-3), n (%)</b> | 2 (100.0)                               | 7 (31.8)                                | 0.130          |
| <b>Neurological worsening, n (%)</b>               | 0 (0.0)                                 | 3 (13.6)                                | 1.000          |
| <b>In hospital mortality, n (%)</b>                | 0 (0.0)                                 | 3 (13.6)                                | 1.000          |

IS: ischemic stroke, mRS: modified Rankin Scale, SAH: subarachnoid hemorrhage, ICH: intracerebral hemorrhage
